# Supplementary material for: Identification of Cardiomyopathy-Associated Circulating miRNA Biomarkers in Muscular Dystrophy Female Carriers Using a Complementary Cardiac Imaging and Plasma Profiling Approach
Source: PubMed Central journal article supplement (PMC6308188; doi:10.3389/fphys.2018.01770), 2018-12-21
Supplement: Table_1.pdf [file Table_1.pdf]

**Supplementary table 1: Detailed list of dystrophin gene mutations**

| Sample     | Sample ID for publication | Disease status | Dystrophin gene mutation   |
|------------|---------------------------|----------------|----------------------------|
| RBK109-108 | #2                        | BMD            | Deletion Exon 45-51        |
| RBK109-121 | #3                        | BMD            | Deletion Exon 45-55        |
| RBK109-147 | #4                        | BMD            | Deletion Exon 45-47        |
| RBK109-157 | #5                        | BMD            | Deletion Exon 45-49        |
| RBK109-192 | #6                        | BMD            | Splice mutation c.186+2T>C |
| RBK109-20  | #7                        | BMD            | Duplication Exon 29-34     |
| RBK109-270 | #8                        | BMD            | c.5587-7T>A                |
| RBK109-279 | #9                        | BMD            | Deletion Exon 17-18        |
| RBK109-37  | #10                       | BMD            | Deletion Exon 45-48        |
| RBK109-82  | #11                       | BMD            | Duplication Exon 2-7       |
| RBK109-87  | #12                       | BMD            | Mutation Exon 8            |
| RBK109-111 | #13                       | DMD            | Duplication Exon 18-29     |
| RBK109-112 | #14                       | DMD            | Duplication Exon 18-29     |
| RBK109-118 | #15                       | DMD            | Deletion Exon 48-50        |
| RBK109-127 | #16                       | DMD            | Deletion Exon 48-54        |
| RBK109-140 | #17                       | DMD            | Deletion Exon 45-50        |
| RBK109-141 | #18                       | DMD            | Deletion Exon 9-28         |
| RBK109-167 | #19                       | DMD            | Duplication Exon 42-50     |
| RBK109-177 | #20                       | DMD            | Duplication Exon 42-50     |
| RBK109-246 | #21                       | DMD            | Deletion Exon 46-55        |
| RBK109-247 | #22                       | DMD            | Deletion Exon 46-55        |
| RBK109-45  | #23                       | DMD            | Mutation Exon 55           |
| RBK109-56  | #24                       | DMD            | Duplication Exon 8-11      |
| RBK109-60  | #25                       | DMD            | Deletion Exon 8-28         |
| RBK109-62  | #26                       | DMD            | Deletion Exon 8-28         |
| RBK109-63  | #27                       | DMD            | Deletion Exon 8-28         |
| RBK109-74  | #28                       | DMD            | Deletion Exon 43           |
| RBK109-94  | #30                       | DMD            | Duplication Exon 5-18      |
| RBK109-95  | #31                       | DMD            | Deletion Exon 51           |
