# Supplementary material for: Identification of Cardiomyopathy-Associated Circulating miRNA Biomarkers in Muscular Dystrophy Female Carriers Using a Complementary Cardiac Imaging and Plasma Profiling Approach
Source: PubMed Central journal article supplement (PMC6308188; doi:10.3389/fphys.2018.01770), 2018-12-21
Supplement: Table_2.pdf [file Table_2.pdf]

**Supplemental Table 2 (appendix). Serum miRNA results in male vs. female controls**

| <b>miRNA<br/>serum levels* (*10<sup>3</sup>)</b> | <b>Male controls<br/>N = 26</b> | <b>Female controls<br/>N = 24</b> | <b>p value</b> |
|--------------------------------------------------|---------------------------------|-----------------------------------|----------------|
| <b>Age, years</b>                                | 36 ± 13                         | 41 ± 11                           | 0.15           |
| <b>-206</b>                                      | 0.19 (0.12-0.64)                | 0.38 (0.13-0.87)                  | 0.32           |
| <b>-144</b>                                      | 13.16 (6.53-19.63)              | 12.65 (9.12-21.03)                | 0.92           |
| <b>-146b-5p</b>                                  | 16.64 (6.86-33.02)              | 19.88 (6.41-42.27)                | 0.57           |
| <b>-15b</b>                                      | 2.46 (0.81-3.93)                | 2.75 (1.24-8.49)                  | 0.39           |
| <b>-195</b>                                      | 13.63 (10.46-16.81)             | 13.46 (11.74-15.91)               | 0.88           |
| <b>-20b</b>                                      | 35.95 (27.39-51.02)             | 41.51 (31.65-66.94)               | 0.11           |
| <b>-21-5p</b>                                    | 9.58 (5.86-18.33)               | 10.55 (7.06-25.90)                | 0.60           |
| <b>-221</b>                                      | 10.61 (7.73-17.12)              | 13.59 (0.89-35.06)                | 0.83           |
| <b>-222</b>                                      | 79.22 (43.34-169.52)            | 95.65 (67.93-149.18)              | 0.61           |
| <b>-26a</b>                                      | 49.40 (26.58-63.10)             | 52.50 (17.12-136.09)              | 0.71           |
| <b>-29a</b>                                      | 0.07 (0.00-1.11)                | 0.93 (0.00-2.01)                  | 0.45           |
| <b>-29c</b>                                      | 0.56 (0.27-2.72)                | 0.83 (0.00-2.32)                  | 0.38           |
| <b>-342</b>                                      | 73.89 (45.30-171.19)            | 98.71 (66.63-142.78)              | 0.66           |
| <b>-378a-3p</b>                                  | 0.00 (0.00-0.18)                | 0.00 (0.00-0.34)                  | 0.56           |
| <b>-378a-5p</b>                                  | 0.58 (0.30-1.79)                | 0.85 (0.48-1.55)                  | 0.24           |
| <b>-451</b>                                      | 144.45 (107.74-169.24)          | 124.83 (103.12-185.29)            | 0.61           |
| <b>-93</b>                                       | 35.37 (25.60-49.70)             | 38.71 (27.66-46.52)               | 0.83           |

(\*) – Each miRNA serum level was normalized to miRNA-16 serum levels and thereafter multiplied by 10<sup>3</sup> in order to increase readability.

**Supplemental table 3 (Appendix). Serum miRNA results in male MD patients vs. MD-carriers**

| <b>miRNA<br/>serum levels* (*10<sup>3</sup>)</b> | <b>MD patients<br/>N = 25</b> | <b>MD-carriers<br/>N = 29</b> | <b>p value</b> |
|--------------------------------------------------|-------------------------------|-------------------------------|----------------|
| <b>Age, years mean +-<br/>sd</b>                 | 36 ± 19                       | 45 ± 14                       | 0.09           |
| <b>DMD, n (%)</b>                                | 12 (48)                       | 18 (62)                       | 0.41           |
| <b>-206</b>                                      | 15.54 (3.78-50.37)            | 38.73 (10.86-70.06)           | 0.15           |
| <b>-144</b>                                      | 78.92 (0.00-228.67)           | 0.00 (0.00-0.00)              | <b>0.001</b>   |
| <b>-146b-5p</b>                                  | 7.41 (0.00-90.29)             | 0.00 (0.00-95.45)             | 0.78           |
| <b>-15b</b>                                      | 0.37 (0.00-28.20)             | 0.00 (0.00-13.13)             | 0.27           |
| <b>-195</b>                                      | 11.28 (0.57-28.38)            | 9.99 (0.58-20.91)             | 0.72           |
| <b>-20b</b>                                      | 65.52 (19.11-83.77)           | 35.91 (11.55-66.22)           | 0.39           |
| <b>-21-5p</b>                                    | 40.26 (0.00-108.25)           | 2.92 (0.00-77.28)             | 0.45           |
| <b>-221</b>                                      | 0.00 (0.00-29.46)             | 0.00 (0.00-32.99)             | 0.60           |
| <b>-222</b>                                      | 1616.92 (638.43-4732.47)      | 3972.80 (1489.47-6881.28)     | 0.11           |
| <b>-26a</b>                                      | 257.99 (121.01-460.52)        | 191.59 (40.72-474.63)         | 0.48           |
| <b>-29a</b>                                      | 0.00 (0.00-0.00)              | 0.00 (0.00-0.00)              | 0.54           |
| <b>-29c</b>                                      | 0.00 (0.00-0.00)              | 0.09 (0.00-1.64)              | <b>0.024</b>   |
| <b>-342</b>                                      | 2069.11 (860.67-4114.63)      | 2633.27 (1194.51-4321.52)     | 0.53           |
| <b>-378a-3p</b>                                  | 15.33 (0.00-69.46)            | 3.59 (0.00-88.53)             | 0.50           |
| <b>-378a-5p</b>                                  | 21.14 (8.84-66.22)            | 53.57 (18.76-170.52)          | 0.18           |
| <b>-451</b>                                      | 147.28 (30.24-243.25)         | 144.00 (0.00-244.83)          | 0.97           |
| <b>-93</b>                                       | 26.19 (0.00-44.47)            | 13.50 (0.00-55.57)            | 0.85           |

(\*) – Each miRNA serum level was normalized to miRNA-16 serum levels and thereafter multiplied by 10<sup>3</sup> in order to increase readability.
